# Supplementary material
Source: publisher figshare collection journal article supplement (https://frontiersin.figshare.com/ndownloader/files/15260651)
Supplement: Supplementary file [file 15260651]

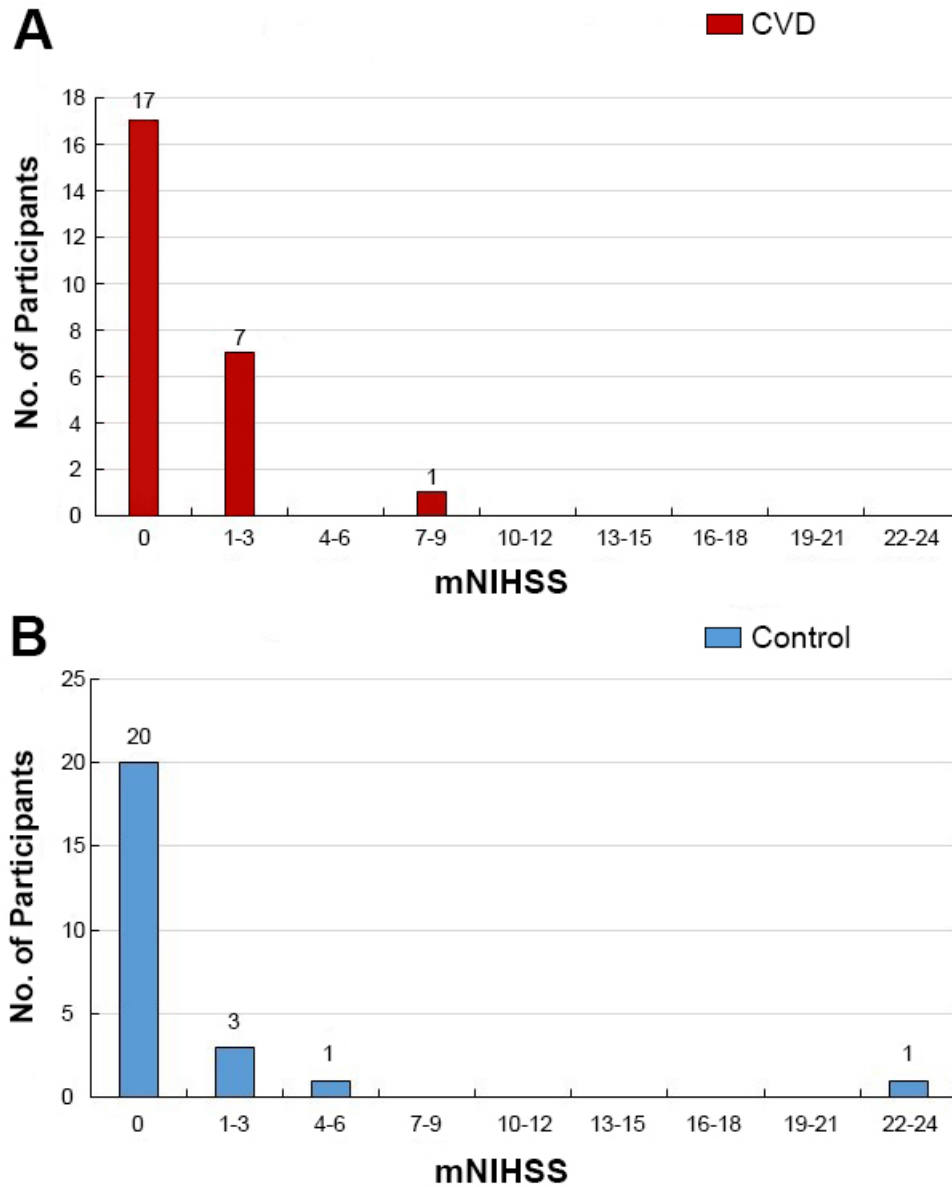

**Supplementary Figure 1.** Proportion of participants with increased modified NIH Stroke Scale (mNIHSS) scores for (A) CVD (cerebrovascular disease) and (B) control groups. Exams were performed once daily for the first three postoperative days, and any increase from baseline during this timeframe was reported. There was no significant overall difference between the groups ( $P=0.328$ ).
